# Supplementary material
Source: PubMed Central journal article supplement (PMC7450125)
Supplement: supp_RA120.014018_160347_3_supp_551945_qcbvcg.pdf [file supp_RA120.014018_160347_3_supp_551945_qcbvcg.pdf]

# Supplemental Figure 1

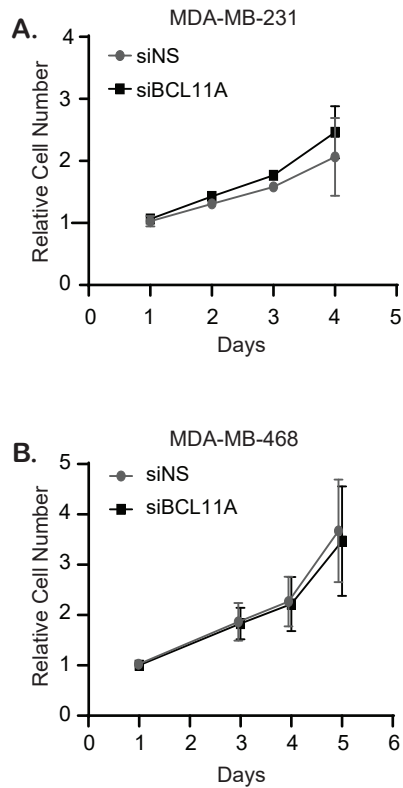

**Supplemental Figure 1. Transient *BCL11A* silencing does not impact growth in TNBC cell lines.** A) MDA-MB-231 and B) MDA-MB-468 cells were transiently transfected with either siRNA directed to the *BCL11A* gene or a non-specific siRNA control, and Cyto-X colorimetric cell counting reagent was used to quantify cell number over time. Data is expressed as fold change over day 1 of plating. Error bars represent the standard deviation of 3 independent experiments, each performed in quadruplicate.

## Supplemental Figure 2

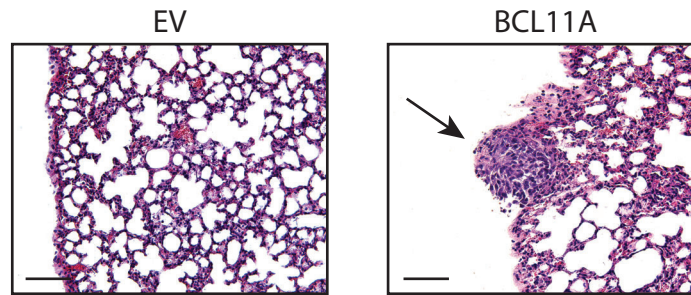

**Supplemental Figure 2. BCL11A enhances metastatic outgrowth of TNBC cells in mouse lung.** Hematoxylin and eosin-stained sections of mouse lungs 31 days after left-ventricular xenograft with empty-vector (EV) or BCL11A-overexpressing (BCL11A) SUM149PT-FFluc cells. Arrow points to metastatic lesion, scale bar = 100 $\mu$ m.

# Supplemental Figure 3

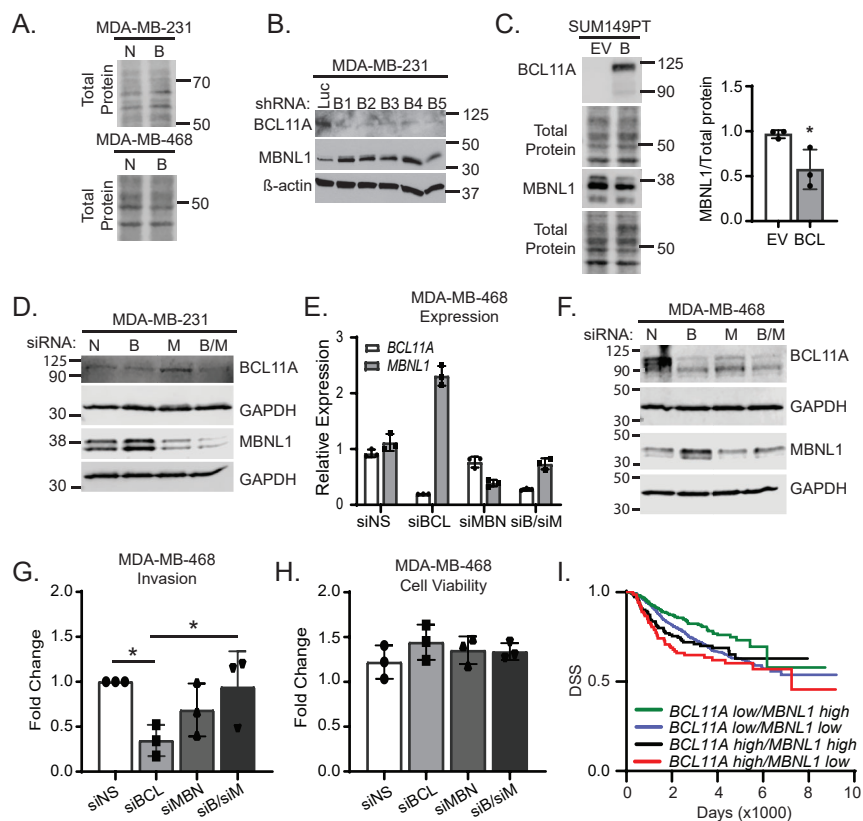

**Supplemental Figure 3. BCL11A suppression of MBNL1 sustains invasion of TNBC cells.** A) Left: Total protein for western blots in Figure 4B; N=non-targeting control, B=siBCL 11A. B) Lentinal transduction of shRNAs targeting luciferase (Luc) or BCL11A (5 clones; labeled B1-B5). C) Representative western blot and quantitation of decreased MBNL1 protein expression in SUM149PT cells from 3 independent experiments and normalized to total protein; EV=empty vector control, B=BCL11A-overexpressing cells. Significance was determined using an unpaired *t*-test, \**p*<0.05. D) Representative western blot of MDA-MB-231 cells with transient silencing of BCL11A, MBNL1 or the combination; N=siNS, B=siBCL11A, M=siMBNL1, B/M= siBCL11A/siMBNL1. E) Expression of BCL11A and MBNL1 in MDA-MB-468 cells after transient silencing of BCL11A or MBNL1 or the combination as measured by RT-qPCR. F) Representative western blots of MDA-MB-468 cells transiently silenced as in E). G) Fold change in invasion (over 16 hours) was determined after 48 hours of BCL11A, MBNL1 or BCL11A and MBNL1 silencing in the MDA-MB-468 cells. Invasion experiments were performed in technical duplicates in 3 independent experiments, significance was determined using an unpaired *t*-test, \**p*<0.05. H) Fold change in cell growth 3 days after transient silencing of BCL11A, MBNL1 or the combination in MDA-MB-468 cells as measured using the CytoX colorimetric assay. I) Disease specific survival (DSS) was calculated using the METABRIC dataset. BCL11A High + MBNL1 High (n=148), BCL11A High + MBNL1 Low (n=148), BCL11A Low + MBNL1 High (n= 345), BCL11A Low + MBNL1 Low (1330), *p*=0.002.

# Supplemental Figure 4

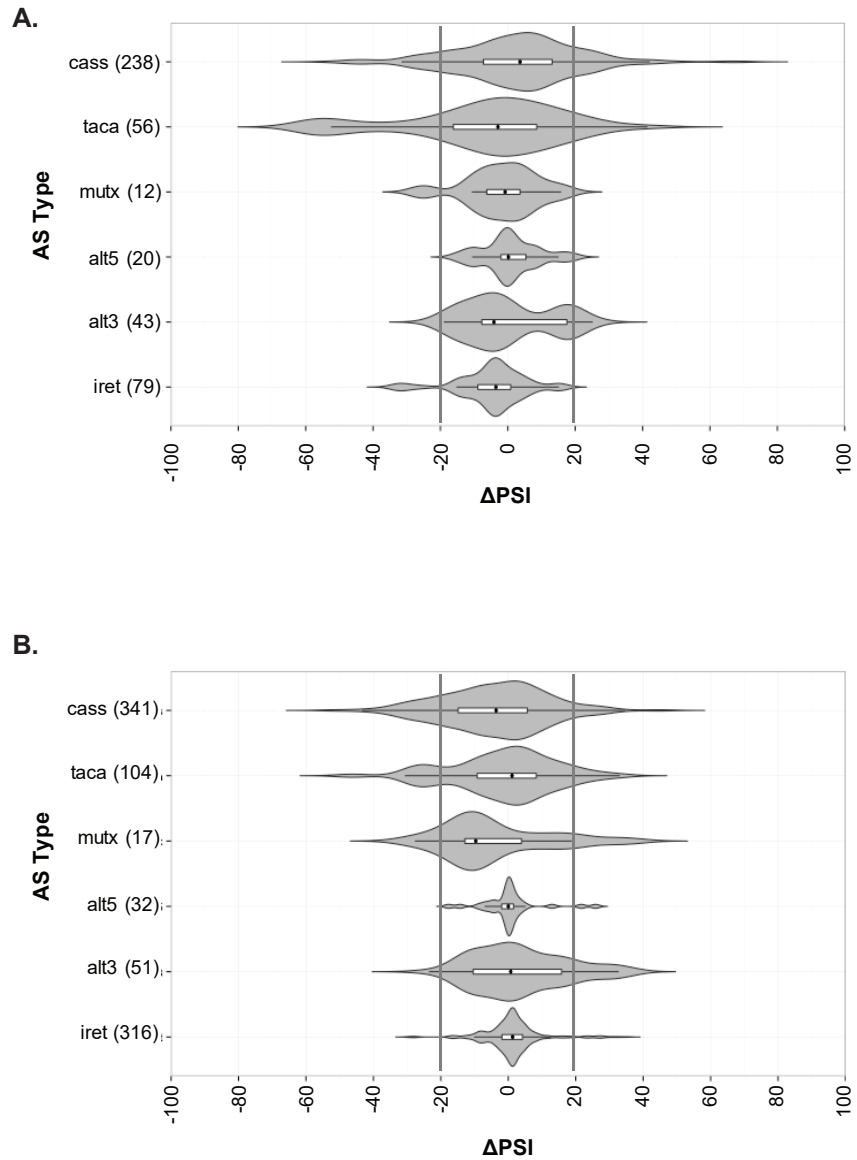

**Supplemental Figure 4. Classification of splicing events with modulation of MBNL1 or the combination of MBNL1 and BCL11A.** A) Violin plot of statistically significant splicing changes in MDA-MB-231 cells comparing siNS versus siMBNL1-transfected cells and B) siNS versus siBCL11A/siMBNL1. Criteria:  $p < 0.05$  and  $FDR < 0.05$ . Cass=cassette exons, taca=tandom cassette exons, mutx=mutually exclusive exons, alt5=5' splice site selection, alt3=3' splice site selection, iret=intron retention.

# Supplemental Figure 5

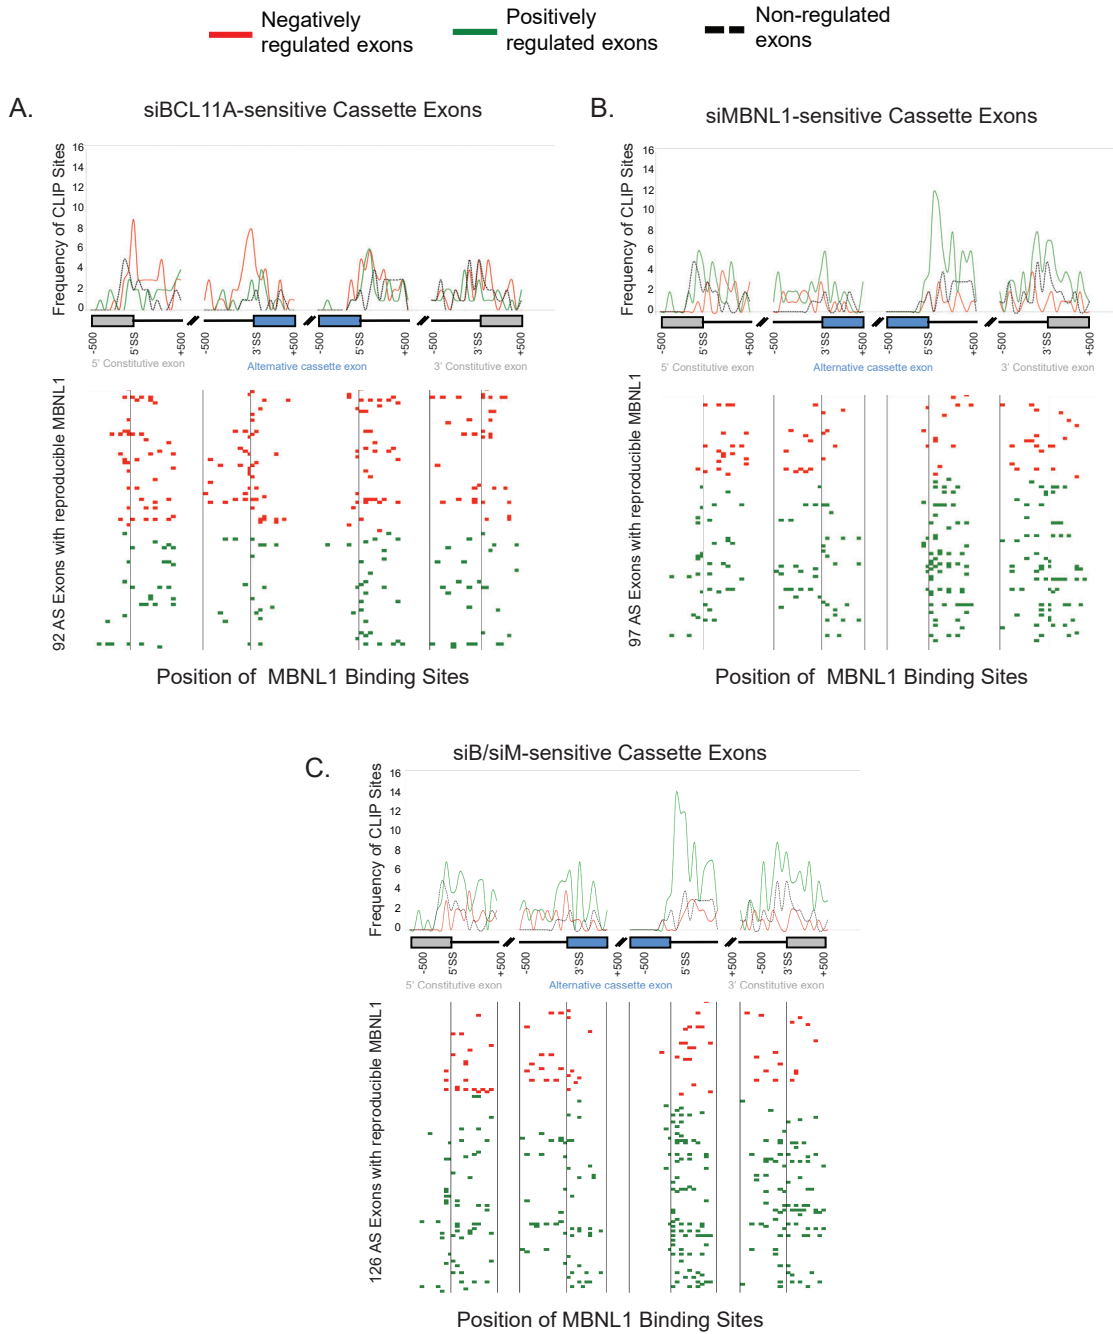

**Supplemental Figure 5. Reproducible MBNL1 CLIP sites relative to sensitive cassette exons identified by RNA-Seq analysis.** For all panels, Top: Genome-wide frequency of MBNL1 CLIP sites, red=negatively regulated exons, green=positively regulated exons, black=non-regulated exons. Bottom: Position of reproducible MBNL1 binding sites relative to AS exons with A) siBCL11A; red=51 repressed exons, green=41 enhanced exons; B) siMBNL1; red=64 repressed exons, green=64 enhanced exons; C) siB/siM; red=41 repressed exons, green=85 enhanced exons.

## Supplemental Figure 6

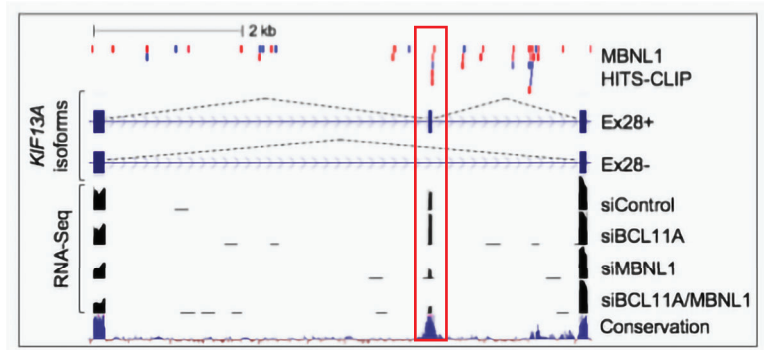

**Supplemental Figure 6. BCL11A promotes alternative splicing of an MBNL1-sensitive exon of *KIF13A*.** Top: CLIP reads from biologically reproducible replicates of MBNL1-bound libraries; Library 1=red and Library 2=blue, Middle: diagram of AS *KIF13A* isoforms +/- exon 28 (red outline), Bottom: corresponding RNA-Seq tracks for each siRNA condition and Conservation (blue).

# Supplemental Figure 7

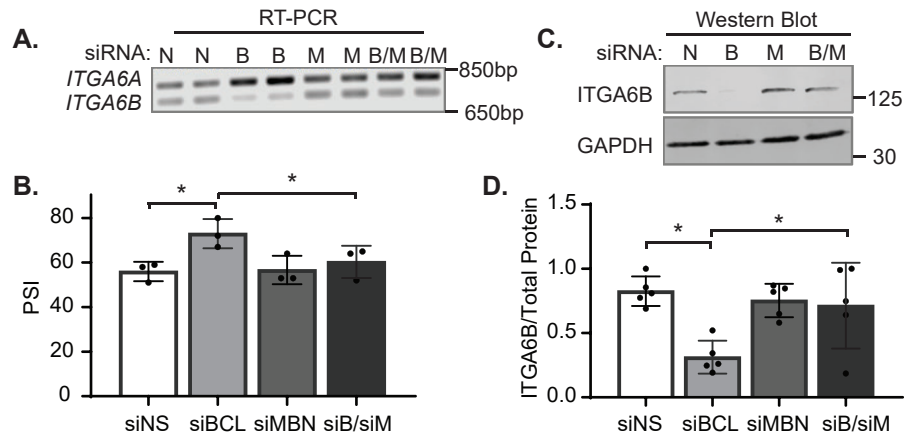

**Supplemental Figure 7. BCL11A promotes expression of the *ITGA6* stem-like splice form (*ITGA6B*).** A) Representative gel image of *ITGA6* alternative splicing determined by RT-PCR in the MDA-MB-468 TNBC cell line. B) Quantitation of *ITGA6* alternative splicing in 3 independent experiments, each done in duplicate. C) Representative western blot of the *ITGA6B* stem-like splice form in the MDA-MB-468 cell line. D) Quantitation of protein expression of the *ITGA6B* isoform in 3 independent experiments. Significance of differences were calculated using an unpaired *t*-test, \**p*<0.05.

**Table 1. The BCL11A-regulated transcriptome in MDA-MB-231 TNBC cells**

| gene_symbol  | logFC | PValue    | adjusted Pvalue |
|--------------|-------|-----------|-----------------|
| ACADM        | 1.18  | 2.65E-18  | 1.25E-16        |
| ACADSB       | -1.06 | 5.07E-13  | 1.37E-11        |
| ACOX2        | -1.09 | 9.14E-09  | 1.32E-07        |
| ACSS3        | -1.60 | 8.89E-16  | 3.27E-14        |
| ADAM28       | -1.60 | 3.34E-12  | 7.94E-11        |
| ADAM8        | -1.97 | 6.23E-51  | 3.02E-48        |
| ADAMTS9      | -2.11 | 9.04E-109 | 4.20E-105       |
| ADAP1        | -2.19 | 2.27E-22  | 1.65E-20        |
| ADIPOR1      | -1.09 | 1.08E-26  | 1.14E-24        |
| AIM2         | -0.94 | 4.96E-05  | 3.66E-04        |
| AKNA         | -1.32 | 5.62E-16  | 2.09E-14        |
| ALDH1A3      | -1.18 | 1.79E-12  | 4.39E-11        |
| ALDOC        | -2.20 | 1.17E-09  | 1.92E-08        |
| AMPD3        | -1.89 | 4.65E-33  | 8.13E-31        |
| ANKRD52      | 1.39  | 4.33E-48  | 1.90E-45        |
| ANXA1        | 1.81  | 1.42E-138 | 1.65E-134       |
| ANXA10       | -1.37 | 2.90E-08  | 3.88E-07        |
| ANXA8L2      | -0.95 | 8.49E-08  | 1.05E-06        |
| APOL3        | -1.05 | 3.32E-09  | 5.11E-08        |
| AQP1         | -2.35 | 2.73E-22  | 1.97E-20        |
| AQP3         | -2.06 | 1.00E-20  | 6.12E-19        |
| AREG         | -1.41 | 9.78E-13  | 2.50E-11        |
| ARFIP1       | 1.01  | 4.41E-22  | 3.10E-20        |
| ARG2         | -1.51 | 3.35E-25  | 3.11E-23        |
| ARHGEF26     | 1.52  | 2.65E-28  | 3.20E-26        |
| ARL13B       | 1.41  | 1.63E-29  | 2.22E-27        |
| ARL6         | -1.59 | 2.92E-10  | 5.30E-09        |
| ARL6IP5      | -0.94 | 1.19E-20  | 7.19E-19        |
| ARRDC3       | 1.17  | 1.10E-41  | 3.45E-39        |
| ARSE         | -1.45 | 2.74E-09  | 4.26E-08        |
| ARSI         | -2.00 | 8.14E-21  | 5.07E-19        |
| ARTN         | -1.22 | 1.59E-03  | 8.19E-03        |
| ASB2         | -2.04 | 4.10E-25  | 3.78E-23        |
| B3GNT5       | -1.36 | 9.16E-21  | 5.63E-19        |
| BATF         | -1.53 | 3.23E-06  | 2.99E-05        |
| BDH2         | -1.35 | 3.21E-14  | 1.00E-12        |
| BET1         | -1.14 | 1.16E-10  | 2.23E-09        |
| BICC1        | -1.52 | 4.45E-27  | 4.83E-25        |
| BMPER        | -1.97 | 3.58E-33  | 6.30E-31        |
| BRCA2        | 1.31  | 1.41E-35  | 3.03E-33        |
| BUB1B        | 1.02  | 1.07E-26  | 1.13E-24        |
| C10orf116    | -1.14 | 4.21E-15  | 1.45E-13        |
| C10orf118    | -1.26 | 1.27E-17  | 5.45E-16        |
| C10orf2      | 0.97  | 2.44E-14  | 7.74E-13        |
| C11orf82     | 1.13  | 8.39E-19  | 4.23E-17        |
| C11orf86     | -2.20 | 4.55E-09  | 6.90E-08        |
| C12orf57     | -1.31 | 5.91E-13  | 1.58E-11        |
| C15orf48     | -1.34 | 8.82E-40  | 2.44E-37        |
| C16orf45     | -1.15 | 2.61E-08  | 3.53E-07        |
| C17orf28     | -1.72 | 2.70E-17  | 1.12E-15        |
| C1orf112     | 1.28  | 7.72E-29  | 9.90E-27        |
| C1orf135     | 1.00  | 7.42E-11  | 1.47E-09        |
| C1orf38      | -1.37 | 4.16E-06  | 3.78E-05        |
| C1QTNF9B-AS1 | 1.68  | 2.18E-05  | 1.73E-04        |
| C1R          | -1.14 | 6.20E-06  | 5.49E-05        |
| C21orf119    | -1.59 | 2.98E-05  | 2.31E-04        |
| C2CD3        | 1.41  | 4.79E-49  | 2.14E-46        |
| C3           | -1.61 | 1.15E-18  | 5.78E-17        |
| C5orf28      | 1.34  | 2.90E-13  | 8.09E-12        |
| C6orf226     | -1.41 | 3.27E-07  | 3.66E-06        |
| C9orf40      | 1.00  | 1.47E-09  | 2.39E-08        |
| CA11         | -2.78 | 7.05E-15  | 2.35E-13        |
| CA9          | -2.43 | 2.64E-15  | 9.29E-14        |
| CACFD1       | -1.47 | 1.68E-16  | 6.52E-15        |
| CALB2        | -1.30 | 5.25E-42  | 1.67E-39        |
| CAPN5        | -1.26 | 5.71E-15  | 1.93E-13        |
| CARD11       | -1.15 | 2.25E-15  | 7.98E-14        |
| CARD6        | -1.11 | 1.40E-08  | 1.97E-07        |
| CATSPER1     | -1.95 | 6.32E-21  | 4.00E-19        |
| CCDC28B      | -1.42 | 1.69E-07  | 1.98E-06        |
| CCDC69       | -1.27 | 1.93E-26  | 2.00E-24        |
| CCNA1        | -1.21 | 8.87E-05  | 6.25E-04        |
| CCNT2        | -1.19 | 1.39E-12  | 3.47E-11        |
| CD27-AS1     | -1.10 | 9.96E-06  | 8.48E-05        |
| CD2AP        | 1.12  | 5.79E-47  | 2.39E-44        |
| CD68         | -1.06 | 8.06E-24  | 6.59E-22        |
| CD74         | -1.21 | 3.59E-43  | 1.19E-40        |
| CD82         | -1.17 | 1.47E-36  | 3.52E-34        |
| CDC37L1      | -0.86 | 5.04E-04  | 2.96E-03        |
| CDC44        | 1.03  | 9.60E-22  | 6.52E-20        |
| CDC45        | 0.91  | 4.36E-22  | 3.07E-20        |
| CDK15        | -1.23 | 4.94E-11  | 1.01E-09        |
| CDK2         | 1.98  | 5.46E-66  | 6.04E-63        |
| CDK6         | 1.81  | 7.29E-107 | 2.58E-103       |
| CDKL1        | 1.18  | 1.10E-08  | 1.58E-07        |
| CDKN1C       | -2.12 | 2.34E-12  | 5.68E-11        |
| CDV3         | 1.37  | 2.51E-73  | 3.65E-70        |
| CENPF        | 1.10  | 5.25E-51  | 2.60E-48        |
| CENPQ        | 1.94  | 9.77E-56  | 6.48E-53        |
| CEP19        | -1.42 | 1.45E-07  | 1.72E-06        |
| CEP57L1      | 1.61  | 5.23E-24  | 4.35E-22        |
| CFP          | -2.26 | 1.18E-25  | 1.14E-23        |
| CHEK2        | 0.87  | 1.30E-03  | 6.86E-03        |
| CHMP1B       | -1.05 | 3.79E-13  | 1.05E-11        |
| CHST2        | -1.03 | 4.76E-09  | 7.19E-08        |
| CIITA        | -0.97 | 7.51E-09  | 1.10E-07        |
| CKS1B        | 1.07  | 1.56E-29  | 2.13E-27        |



|            |       |           |           |
|------------|-------|-----------|-----------|
| CLSTN3     | -2.00 | 8.71E-32  | 1.42E-29  |
| CLU        | -1.32 | 1.90E-31  | 3.01E-29  |
| CMTM6      | 1.53  | 2.79E-65  | 2.95E-62  |
| CNIH3      | -0.95 | 9.71E-09  | 1.40E-07  |
| GNKSR3     | 1.14  | 4.31E-18  | 1.96E-16  |
| COL17A1    | -1.36 | 2.49E-32  | 4.23E-30  |
| COL1A1     | -2.14 | 8.68E-21  | 5.38E-19  |
| COL4A5     | -1.58 | 5.28E-30  | 7.34E-28  |
| COL5A1     | -1.36 | 2.16E-44  | 7.84E-42  |
| COL6A3     | -1.13 | 4.65E-20  | 2.64E-18  |
| COL7A1     | -1.27 | 1.54E-30  | 2.24E-28  |
| CORO2B     | -1.95 | 3.88E-22  | 2.76E-20  |
| CPT1C      | -2.18 | 2.24E-14  | 7.15E-13  |
| CRISPLD2   | -1.63 | 1.51E-44  | 5.58E-42  |
| CSF1R      | -1.93 | 1.21E-13  | 3.55E-12  |
| CSGALNACT1 | -0.97 | 1.02E-08  | 1.46E-07  |
| CST1       | -2.99 | 3.78E-79  | 7.32E-76  |
| CST2       | -1.67 | 2.74E-12  | 6.55E-11  |
| CST4       | -2.49 | 7.99E-55  | 5.02E-52  |
| CST7       | -1.89 | 8.78E-25  | 7.78E-23  |
| CTSW       | -2.15 | 7.50E-07  | 7.77E-06  |
| CX3CL1     | -2.33 | 3.45E-27  | 3.80E-25  |
| CXADR      | -1.47 | 1.42E-18  | 6.95E-17  |
| CXCL11     | -1.65 | 8.15E-08  | 1.01E-06  |
| CYB5B      | 1.16  | 2.08E-36  | 4.88E-34  |
| CYTH4      | -2.65 | 2.18E-17  | 9.15E-16  |
| DAP        | -1.38 | 5.01E-22  | 3.49E-20  |
| DCAF16     | 1.23  | 4.69E-29  | 6.05E-27  |
| DCP2       | 1.11  | 5.05E-34  | 9.30E-32  |
| DEPDC1B    | 1.21  | 5.91E-20  | 3.32E-18  |
| DIAPH3     | 1.08  | 1.69E-31  | 2.70E-29  |
| DKC1       | 1.09  | 5.52E-44  | 1.91E-41  |
| DMBT1      | -1.64 | 9.10E-53  | 5.03E-50  |
| DNAJA2     | -1.05 | 7.46E-31  | 1.11E-28  |
| DOCK4      | -1.06 | 2.38E-28  | 2.90E-26  |
| DONSON     | 1.05  | 2.66E-25  | 2.50E-23  |
| DTL        | 1.13  | 7.86E-34  | 1.40E-31  |
| DUSP6      | -1.18 | 1.86E-41  | 5.62E-39  |
| DYRK1B     | -1.59 | 1.46E-11  | 3.19E-10  |
| EDN2       | -2.40 | 4.20E-15  | 1.45E-13  |
| EFR3A      | -1.13 | 3.49E-43  | 1.18E-40  |
| EGLN3      | -1.14 | 5.77E-13  | 1.54E-11  |
| EHD3       | -1.33 | 4.17E-12  | 9.76E-11  |
| EHF        | -1.47 | 2.01E-63  | 2.02E-60  |
| ELFN2      | -1.36 | 1.14E-22  | 8.45E-21  |
| ELL2       | -1.17 | 6.56E-36  | 1.45E-33  |
| ELOVL7     | 1.17  | 2.20E-07  | 2.53E-06  |
| ENO2       | -1.51 | 1.14E-34  | 2.27E-32  |
| ENPP4      | -1.83 | 6.81E-17  | 2.73E-15  |
| ENTPD3     | -2.99 | 9.13E-30  | 1.26E-27  |
| EPB41L4B   | -1.11 | 1.18E-15  | 4.32E-14  |
| EPHA4      | -1.10 | 1.32E-13  | 3.85E-12  |
| ERI2       | 1.01  | 1.85E-11  | 3.99E-10  |
| ESAM       | -1.29 | 1.33E-26  | 1.40E-24  |
| ETF1       | 1.19  | 7.60E-59  | 6.09E-56  |
| ETV7       | -2.04 | 1.84E-12  | 4.51E-11  |
| EV12B      | -1.21 | 3.15E-07  | 3.53E-06  |
| F2RL3      | -2.62 | 9.52E-17  | 3.77E-15  |
| FADS2      | -1.45 | 7.02E-47  | 2.81E-44  |
| FAIM3      | -1.86 | 1.36E-17  | 5.83E-16  |
| FAM171B    | -1.20 | 4.31E-10  | 7.60E-09  |
| FAM176A    | -1.19 | 2.19E-14  | 7.02E-13  |
| FAM210B    | -1.69 | 1.53E-31  | 2.46E-29  |
| FAM43A     | -2.36 | 2.72E-18  | 1.28E-16  |
| FAM54A     | 1.29  | 4.03E-18  | 1.84E-16  |
| FAM63A     | -1.22 | 2.42E-09  | 3.79E-08  |
| FAM63B     | -0.98 | 2.03E-07  | 2.35E-06  |
| FAM83A     | -1.97 | 2.24E-34  | 4.29E-32  |
| FAM84B     | -1.16 | 4.48E-17  | 1.82E-15  |
| FAM89A     | 1.40  | 1.80E-04  | 1.19E-03  |
| FAM96A     | -1.50 | 5.71E-15  | 1.93E-13  |
| FANCB      | 1.51  | 6.59E-19  | 3.34E-17  |
| FBXL12     | 0.87  | 2.07E-07  | 2.40E-06  |
| FHOD3      | -1.24 | 1.47E-42  | 4.73E-40  |
| FIGL1      | 1.13  | 6.80E-18  | 3.00E-16  |
| FLG        | 1.07  | 6.41E-22  | 4.40E-20  |
| FLJ20021   | -1.10 | 1.46E-03  | 7.60E-03  |
| FOXQ1      | -1.18 | 1.55E-11  | 3.37E-10  |
| FPR1       | -1.91 | 1.39E-25  | 1.33E-23  |
| FST        | 1.01  | 1.03E-16  | 4.04E-15  |
| FUCA1      | -1.19 | 3.49E-36  | 7.95E-34  |
| G3BP1      | 1.06  | 2.44E-45  | 9.44E-43  |
| GALNT12    | -2.15 | 2.26E-13  | 6.36E-12  |
| GALNT3     | -1.55 | 1.98E-24  | 1.71E-22  |
| GALNT6     | -1.75 | 4.79E-44  | 1.69E-41  |
| GBP2       | -2.23 | 1.71E-54  | 1.05E-51  |
| GDF5       | -1.51 | 1.50E-10  | 2.83E-09  |
| GDPD5      | -2.11 | 2.80E-35  | 5.80E-33  |
| GEMIN5     | 1.49  | 1.07E-66  | 1.24E-63  |
| GFPT2      | -1.53 | 4.82E-41  | 1.42E-38  |
| GGT1       | -1.56 | 2.10E-10  | 3.88E-09  |
| GINS1      | 1.16  | 1.88E-25  | 1.78E-23  |
| GINS2      | 1.08  | 3.07E-18  | 1.43E-16  |
| GNG11      | -1.29 | 1.02E-35  | 2.21E-33  |
| GOLGA2     | -1.16 | 6.07E-33  | 1.05E-30  |
| GPR110     | -1.05 | 1.02E-20  | 6.20E-19  |
| GPR116     | -2.14 | 2.31E-128 | 1.34E-124 |
| GPR68      | -1.77 | 2.17E-29  | 2.90E-27  |
| GPR87      | -2.95 | 6.85E-13  | 1.81E-11  |

|              |       |           |           |
|--------------|-------|-----------|-----------|
| GPRC5C       | -1.67 | 8.71E-17  | 3.46E-15  |
| H1F0         | -1.13 | 4.24E-21  | 2.77E-19  |
| H2AFJ        | -1.15 | 1.63E-12  | 4.03E-11  |
| HCAR1        | -3.13 | 1.43E-18  | 6.95E-17  |
| HELLS        | 1.23  | 1.17E-27  | 1.33E-25  |
| HHIP         | -1.19 | 2.23E-05  | 1.77E-04  |
| HIP1         | -1.13 | 8.46E-20  | 4.68E-18  |
| HIST2H3D     | 0.79  | 5.66E-05  | 4.14E-04  |
| HMHA1        | -1.21 | 6.73E-25  | 6.02E-23  |
| HMMR         | 1.48  | 2.04E-31  | 3.19E-29  |
| HMOX1        | 1.24  | 4.24E-20  | 2.44E-18  |
| HN1L         | 1.24  | 6.62E-53  | 3.75E-50  |
| HS3ST1       | -1.84 | 2.64E-08  | 3.56E-07  |
| HTR7         | -1.37 | 5.88E-08  | 7.42E-07  |
| HTRA3        | -1.11 | 3.02E-08  | 4.02E-07  |
| ICAM1        | -1.02 | 9.44E-23  | 7.05E-21  |
| ICAM2        | -1.04 | 4.58E-09  | 6.94E-08  |
| ICOSLG       | -1.28 | 1.20E-09  | 1.98E-08  |
| ID3          | 1.04  | 7.22E-13  | 1.90E-11  |
| IDH1         | -1.17 | 9.97E-29  | 1.25E-26  |
| IDS          | -1.05 | 5.11E-18  | 2.30E-16  |
| IFI6         | -1.47 | 1.39E-09  | 2.26E-08  |
| IFITM1       | -1.56 | 9.81E-19  | 4.93E-17  |
| IFITM2       | -1.27 | 2.68E-18  | 1.26E-16  |
| IGF2BP3      | -1.28 | 4.97E-27  | 5.37E-25  |
| IL1B         | -2.14 | 1.58E-07  | 1.86E-06  |
| IL1RAP       | -1.19 | 1.06E-19  | 5.78E-18  |
| IL24         | -2.88 | 4.18E-57  | 3.13E-54  |
| IL31RA       | -0.92 | 1.53E-12  | 3.79E-11  |
| IL6          | -1.53 | 2.29E-31  | 3.53E-29  |
| IL8          | -0.69 | 4.19E-04  | 2.52E-03  |
| INSIG1       | -0.97 | 5.19E-15  | 1.76E-13  |
| IPPK         | 1.21  | 2.85E-17  | 1.18E-15  |
| IRF7         | -1.34 | 4.96E-08  | 6.34E-07  |
| IRF9         | -1.32 | 7.72E-14  | 2.32E-12  |
| ISG20        | -1.43 | 2.22E-08  | 3.02E-07  |
| ISM1         | -2.25 | 2.03E-16  | 7.84E-15  |
| ITGA2        | -1.58 | 8.43E-83  | 2.17E-79  |
| ITGB1        | 1.25  | 5.96E-69  | 7.69E-66  |
| ITGB2        | -1.31 | 1.02E-12  | 2.61E-11  |
| JUP          | -1.62 | 2.02E-35  | 4.23E-33  |
| KAL1         | -1.49 | 3.57E-50  | 1.62E-47  |
| KCNN4        | -1.15 | 5.16E-21  | 3.31E-19  |
| KCTD12       | -1.11 | 4.32E-12  | 1.01E-10  |
| KIAA0226     | 1.15  | 1.71E-21  | 1.15E-19  |
| KIAA0247     | 1.09  | 1.77E-10  | 3.31E-09  |
| KIAA1199     | -2.08 | 8.06E-129 | 6.24E-125 |
| KIAA1468     | -1.26 | 6.31E-21  | 4.00E-19  |
| KIAA1524     | 1.14  | 3.69E-40  | 1.03E-37  |
| KISS1        | 0.96  | 9.84E-09  | 1.42E-07  |
| KLF11        | 1.20  | 2.59E-14  | 8.18E-13  |
| KLHL15       | 1.24  | 3.36E-18  | 1.55E-16  |
| KLHL23       | 1.02  | 1.65E-07  | 1.94E-06  |
| KLHL5        | -0.95 | 1.88E-24  | 1.63E-22  |
| KRAS         | -1.14 | 2.38E-12  | 5.76E-11  |
| KRT15        | -1.50 | 8.74E-12  | 1.95E-10  |
| KRT19        | -1.32 | 1.79E-50  | 8.51E-48  |
| KRT81        | -1.64 | 5.81E-25  | 5.28E-23  |
| LACC1        | -1.05 | 1.41E-06  | 1.40E-05  |
| LAPTM5       | -2.50 | 1.15E-96  | 3.33E-93  |
| LAT2         | -2.75 | 1.45E-20  | 8.68E-19  |
| LEPREL4      | -1.24 | 2.57E-13  | 7.18E-12  |
| LFNG         | -1.74 | 1.62E-14  | 5.26E-13  |
| LGALS12      | -1.44 | 2.32E-04  | 1.49E-03  |
| LINC00460    | -1.30 | 9.23E-04  | 5.07E-03  |
| LIPG         | -1.73 | 3.51E-20  | 2.05E-18  |
| LIPH         | -0.94 | 4.24E-10  | 7.50E-09  |
| LMNB1        | 1.56  | 1.60E-61  | 1.43E-58  |
| LOC100288077 | -3.14 | 1.38E-56  | 1.00E-53  |
| LOC100499177 | 1.21  | 7.69E-13  | 2.02E-11  |
| LOC339894    | -2.49 | 2.89E-15  | 1.01E-13  |
| LOC388796    | 1.00  | 9.11E-08  | 1.11E-06  |
| LOC646576    | -1.78 | 3.00E-06  | 2.80E-05  |
| LOC81691     | 1.03  | 2.77E-06  | 2.61E-05  |
| LOXL1        | -1.01 | 3.23E-08  | 4.27E-07  |
| LPXN         | -2.13 | 7.07E-56  | 4.83E-53  |
| LRP10        | -1.17 | 4.05E-43  | 1.33E-40  |
| LTBP1        | -1.29 | 1.38E-43  | 4.71E-41  |
| LTBP2        | -1.20 | 3.11E-17  | 1.28E-15  |
| LTBP3        | -1.35 | 7.72E-13  | 2.02E-11  |
| LYPD1        | -0.98 | 1.54E-07  | 1.82E-06  |
| M6PR         | 1.05  | 8.15E-36  | 1.79E-33  |
| MALL         | -1.50 | 4.24E-07  | 4.65E-06  |
| MAP3K13      | -1.64 | 1.69E-31  | 2.70E-29  |
| MAP3K3       | 1.59  | 6.18E-62  | 5.98E-59  |
| MAP3K4       | 1.06  | 3.86E-20  | 2.24E-18  |
| MAPRE3       | -1.46 | 1.67E-06  | 1.63E-05  |
| MB           | -1.78 | 3.11E-13  | 8.63E-12  |
| MBNL1        | 1.47  | 7.21E-75  | 1.12E-71  |
| MBTPS2       | -1.64 | 7.42E-11  | 1.47E-09  |
| MCM10        | 1.12  | 1.95E-35  | 4.16E-33  |
| MCM7         | 1.02  | 2.21E-40  | 6.41E-38  |
| MCM8         | 1.00  | 5.72E-22  | 3.95E-20  |
| MDFIC        | 1.41  | 5.42E-15  | 1.84E-13  |
| MEF2C        | -1.50 | 5.80E-16  | 2.15E-14  |
| MGAT5B       | -1.35 | 5.96E-11  | 1.20E-09  |
| MIA-RAB4B    | -1.50 | 2.79E-08  | 3.75E-07  |
| MIR936       | -4.77 | 1.35E-07  | 1.61E-06  |
| MIS18A       | 0.98  | 4.09E-11  | 8.41E-10  |

|           |       |           |           |
|-----------|-------|-----------|-----------|
| MLKL      | -1.94 | 1.50E-25  | 1.44E-23  |
| MMP1      | -3.41 | 1.68E-191 | 3.91E-187 |
| MMP14     | -1.25 | 5.50E-59  | 4.56E-56  |
| MMS22L    | 1.14  | 1.56E-21  | 1.06E-19  |
| MOB3A     | -1.13 | 4.17E-20  | 2.41E-18  |
| MRPL32    | -1.05 | 1.97E-12  | 4.80E-11  |
| MSRB3     | 1.15  | 2.33E-16  | 8.98E-15  |
| MST4      | -1.19 | 2.13E-17  | 8.94E-16  |
| MT1JP     | -1.30 | 2.09E-04  | 1.36E-03  |
| MT1X      | -1.50 | 1.38E-18  | 6.77E-17  |
| MTMR6     | 1.17  | 3.84E-21  | 2.52E-19  |
| MTRF1     | 1.04  | 7.34E-06  | 6.40E-05  |
| MXD4      | -1.57 | 1.44E-27  | 1.62E-25  |
| MYH16     | -1.23 | 6.83E-06  | 6.00E-05  |
| MYLIP     | 0.98  | 6.84E-10  | 1.18E-08  |
| NAA50     | 1.08  | 1.17E-38  | 3.09E-36  |
| NBEA      | -1.27 | 9.60E-13  | 2.46E-11  |
| NFE2L3    | 1.08  | 2.64E-44  | 9.45E-42  |
| NFIB      | 1.94  | 3.38E-41  | 1.01E-38  |
| NGEF      | -1.28 | 9.10E-15  | 3.01E-13  |
| NGFR      | -1.32 | 2.19E-08  | 2.99E-07  |
| NIPA1     | -1.28 | 1.22E-18  | 6.09E-17  |
| NOG       | -1.45 | 1.62E-16  | 6.31E-15  |
| NPAS2     | -1.20 | 5.61E-17  | 2.26E-15  |
| NRGN      | -1.22 | 2.37E-04  | 1.52E-03  |
| NT5DC3    | 1.43  | 4.85E-38  | 1.27E-35  |
| OAS2      | -1.08 | 3.07E-11  | 6.42E-10  |
| OBFC2A    | 1.31  | 3.05E-36  | 7.08E-34  |
| ORAI3     | -1.18 | 3.99E-12  | 9.35E-11  |
| ORC6      | 1.05  | 8.03E-13  | 2.09E-11  |
| OSTM1     | -1.26 | 1.86E-19  | 9.88E-18  |
| OTUD6B    | 2.09  | 5.23E-34  | 9.49E-32  |
| PARPBP    | 1.09  | 3.92E-18  | 1.80E-16  |
| PBX1      | -1.14 | 2.12E-20  | 1.26E-18  |
| PCDH1     | -1.31 | 1.60E-11  | 3.47E-10  |
| PCNXL2    | -1.32 | 1.04E-20  | 6.34E-19  |
| PCSK1N    | -1.34 | 8.84E-04  | 4.87E-03  |
| PCYOX1L   | -1.09 | 8.47E-10  | 1.43E-08  |
| PDGFRB    | -2.63 | 3.52E-16  | 1.33E-14  |
| PDP1      | -1.04 | 3.72E-30  | 5.24E-28  |
| PFKFB4    | -1.29 | 2.48E-18  | 1.17E-16  |
| PGF       | -2.36 | 2.71E-26  | 2.76E-24  |
| PHF16     | 1.19  | 1.08E-12  | 2.73E-11  |
| PIK3R1    | -0.86 | 1.00E-08  | 1.45E-07  |
| PION      | -1.27 | 1.02E-04  | 7.07E-04  |
| PITPNC1   | -1.54 | 2.90E-17  | 1.20E-15  |
| PITPNM3   | 0.96  | 1.28E-18  | 6.31E-17  |
| PLAGL2    | 1.17  | 1.64E-12  | 4.05E-11  |
| PLAT      | -1.85 | 7.79E-107 | 2.58E-103 |
| PLAUR     | -1.12 | 2.49E-33  | 4.41E-31  |
| PLB1      | -1.82 | 7.29E-35  | 1.46E-32  |
| PLEKHN1   | -1.13 | 1.22E-05  | 1.02E-04  |
| PLK1      | 0.93  | 6.80E-21  | 4.27E-19  |
| PLSCR4    | 2.57  | 6.86E-23  | 5.19E-21  |
| PMCH      | 1.39  | 7.56E-06  | 6.59E-05  |
| PNMAL1    | -1.24 | 3.35E-18  | 1.55E-16  |
| PNRC1     | -1.26 | 1.41E-12  | 3.50E-11  |
| POLR3G    | 1.30  | 2.28E-15  | 8.07E-14  |
| PPAT      | 1.20  | 1.32E-39  | 3.60E-37  |
| PPME1     | 1.48  | 5.52E-80  | 1.16E-76  |
| PPP1R15A  | 0.94  | 4.88E-28  | 5.75E-26  |
| PRKCD     | -1.16 | 6.19E-17  | 2.49E-15  |
| PRMT3     | 1.60  | 1.67E-52  | 8.80E-50  |
| PROCR     | -1.37 | 1.21E-27  | 1.37E-25  |
| PROM2     | -1.87 | 5.29E-16  | 1.96E-14  |
| PRSS1     | -2.13 | 4.73E-09  | 7.15E-08  |
| PRSS2     | -2.86 | 9.92E-14  | 2.95E-12  |
| PRSS22    | -2.00 | 6.62E-07  | 6.95E-06  |
| PRSS3     | -1.31 | 1.68E-12  | 4.15E-11  |
| PRSS3P2   | -2.28 | 6.31E-09  | 9.32E-08  |
| PTGES     | -1.40 | 3.41E-40  | 9.66E-38  |
| PTK2      | -1.46 | 2.98E-51  | 1.51E-48  |
| PTK2B     | -1.31 | 4.12E-18  | 1.88E-16  |
| PTPN22    | -1.96 | 2.37E-16  | 9.10E-15  |
| PTPN6     | -1.74 | 2.06E-12  | 5.02E-11  |
| PTPRJ     | -1.39 | 2.18E-50  | 1.01E-47  |
| PTPRU     | -1.68 | 9.54E-32  | 1.55E-29  |
| PYCARD    | -1.19 | 1.38E-06  | 1.38E-05  |
| RAB11FIP2 | -0.99 | 5.09E-10  | 8.90E-09  |
| RAB20     | -1.01 | 3.15E-06  | 2.93E-05  |
| RAB3D     | -1.69 | 4.53E-29  | 5.88E-27  |
| RAB4B     | -1.32 | 9.46E-05  | 6.63E-04  |
| RABL3     | 1.12  | 5.21E-10  | 9.10E-09  |
| RACGAP1   | 1.13  | 8.44E-45  | 3.22E-42  |
| RAET1G    | -1.21 | 1.67E-05  | 1.36E-04  |
| RAI14     | 1.09  | 1.69E-41  | 5.17E-39  |
| RAMP1     | -1.39 | 4.36E-20  | 2.50E-18  |
| RARRES3   | -1.18 | 3.05E-24  | 2.62E-22  |
| RASD1     | -2.34 | 4.33E-22  | 3.06E-20  |
| RASGRP3   | -1.14 | 5.77E-11  | 1.16E-09  |
| RDH11     | -1.23 | 1.48E-41  | 4.58E-39  |
| RECK      | -1.21 | 1.98E-07  | 2.30E-06  |
| REEP6     | -1.68 | 6.91E-12  | 1.57E-10  |
| RFC4      | 1.12  | 1.99E-34  | 3.85E-32  |
| RGL1      | -1.58 | 1.06E-26  | 1.13E-24  |
| RHEBL1    | 1.55  | 7.13E-08  | 8.88E-07  |
| RILP      | -1.20 | 4.50E-11  | 9.23E-10  |
| RIPK4     | -1.47 | 7.59E-18  | 3.34E-16  |
| RNASE1    | -2.88 | 1.56E-19  | 8.37E-18  |

|          |       |          |          |
|----------|-------|----------|----------|
| RNF128   | -1.37 | 5.59E-14 | 1.72E-12 |
| RNF219   | 1.01  | 1.24E-10 | 2.35E-09 |
| ROBO4    | -1.58 | 2.64E-27 | 2.91E-25 |
| ROGDI    | -1.04 | 1.16E-05 | 9.75E-05 |
| RPIA     | 1.34  | 1.62E-21 | 1.09E-19 |
| RPS27L   | 1.91  | 3.55E-81 | 8.24E-78 |
| RPS6KA2  | -1.97 | 2.32E-56 | 1.63E-53 |
| RSAD1    | 1.12  | 2.20E-14 | 7.03E-13 |
| RTP4     | -1.77 | 2.92E-05 | 2.27E-04 |
| S100A5   | -1.52 | 1.69E-08 | 2.34E-07 |
| SCG5     | -1.10 | 9.63E-13 | 2.47E-11 |
| SCNN1A   | -1.66 | 1.28E-19 | 6.88E-18 |
| SCP2     | -1.05 | 2.29E-31 | 3.53E-29 |
| SEC24A   | -1.12 | 1.08E-25 | 1.06E-23 |
| SEC24D   | -1.17 | 2.90E-37 | 7.33E-35 |
| SECTM1   | -1.97 | 1.24E-27 | 1.40E-25 |
| SELM     | -1.38 | 2.02E-17 | 8.52E-16 |
| SEMA4D   | -1.67 | 6.16E-25 | 5.55E-23 |
| SEMA6B   | -1.88 | 2.35E-40 | 6.73E-38 |
| SERINC5  | 1.18  | 1.02E-16 | 4.02E-15 |
| SERPINA1 | -2.69 | 2.85E-72 | 3.89E-69 |
| SERPINB2 | -1.32 | 2.61E-09 | 4.07E-08 |
| SETD8    | 1.06  | 7.05E-24 | 5.79E-22 |
| SGPL1    | 1.02  | 8.14E-32 | 1.34E-29 |
| SGTB     | -1.14 | 7.94E-11 | 1.56E-09 |
| SH2B3    | -1.59 | 6.74E-62 | 6.26E-59 |
| SH3BP1   | -1.87 | 2.62E-20 | 1.55E-18 |
| SHC3     | -1.19 | 2.26E-24 | 1.94E-22 |
| SHISA2   | -1.32 | 1.64E-17 | 6.99E-16 |
| SHISA4   | -1.13 | 1.19E-10 | 2.27E-09 |
| SHROOM2  | -2.38 | 4.21E-34 | 7.94E-32 |
| SIGIRR   | -1.35 | 1.56E-05 | 1.27E-04 |
| SIPA1L1  | -1.02 | 4.58E-24 | 3.85E-22 |
| SKA1     | 1.32  | 1.20E-30 | 1.75E-28 |
| SKP2     | 1.12  | 6.10E-33 | 1.05E-30 |
| SLC15A3  | -1.31 | 5.00E-13 | 1.36E-11 |
| SLC16A4  | -2.19 | 5.76E-18 | 2.55E-16 |
| SLC17A5  | -0.91 | 5.16E-12 | 1.19E-10 |
| SLC17A9  | 1.09  | 2.18E-21 | 1.45E-19 |
| SLC18B1  | -1.40 | 1.28E-09 | 2.09E-08 |
| SLC22A18 | -1.24 | 1.88E-06 | 1.82E-05 |
| SLC2A3   | -1.78 | 2.37E-45 | 9.32E-43 |
| SLC35A1  | 1.26  | 1.61E-10 | 3.02E-09 |
| SLC4A11  | -1.16 | 1.06E-10 | 2.03E-09 |
| SLC7A2   | 1.09  | 1.80E-18 | 8.67E-17 |
| SLC7A7   | -2.05 | 1.60E-13 | 4.59E-12 |
| SLC9A7   | -1.31 | 1.10E-44 | 4.13E-42 |
| SLCO3A1  | -1.28 | 9.69E-12 | 2.16E-10 |
| SLCO4A1  | -1.58 | 2.65E-12 | 6.37E-11 |
| SLIT2    | -0.99 | 1.93E-15 | 6.88E-14 |
| SNCG     | -2.20 | 2.17E-18 | 1.04E-16 |
| SNHG1    | 1.02  | 3.34E-30 | 4.76E-28 |
| SNORA65  | 1.76  | 2.46E-04 | 1.57E-03 |
| SNORA76  | 1.36  | 1.17E-07 | 1.41E-06 |
| SNRPB2   | 1.16  | 5.23E-34 | 9.49E-32 |
| SNX9     | -1.23 | 1.78E-29 | 2.41E-27 |
| SORL1    | -1.68 | 1.84E-68 | 2.25E-65 |
| SOX4     | -2.39 | 4.44E-35 | 9.04E-33 |
| SPAG4    | -1.59 | 4.02E-11 | 8.30E-10 |
| SPDEF    | -2.75 | 7.81E-52 | 4.03E-49 |
| SPHK1    | -1.03 | 5.28E-08 | 6.71E-07 |
| SPINK4   | -2.41 | 2.89E-31 | 4.41E-29 |
| SPINT1   | -2.36 | 8.54E-21 | 5.30E-19 |
| SRGN     | -0.98 | 8.07E-22 | 5.50E-20 |
| SSH2     | -1.38 | 1.64E-16 | 6.38E-15 |
| SSR3     | 1.16  | 3.14E-53 | 1.82E-50 |
| ST14     | -1.61 | 5.55E-14 | 1.71E-12 |
| ST3GAL5  | -2.77 | 6.32E-55 | 4.08E-52 |
| ST3GAL6  | -1.46 | 4.71E-08 | 6.05E-07 |
| STAM2    | 1.15  | 4.53E-29 | 5.88E-27 |
| STARD10  | -1.28 | 3.63E-17 | 1.48E-15 |
| STC1     | -1.88 | 2.55E-57 | 1.97E-54 |
| STMN3    | -1.50 | 3.59E-25 | 3.32E-23 |
| STX2     | 1.33  | 3.69E-30 | 5.23E-28 |
| SUCLG2   | 1.17  | 3.39E-28 | 4.06E-26 |
| SYPL1    | 1.08  | 1.36E-24 | 1.19E-22 |
| SYT12    | -1.41 | 1.61E-08 | 2.24E-07 |
| SYTL2    | -1.03 | 4.73E-11 | 9.68E-10 |
| TAGLN    | 1.20  | 5.30E-13 | 1.42E-11 |
| TBC1D19  | -1.44 | 8.54E-09 | 1.24E-07 |
| TBC1D9   | -1.03 | 7.26E-25 | 6.46E-23 |
| TCP11L2  | -1.20 | 8.05E-12 | 1.81E-10 |
| TEAD1    | 1.44  | 5.90E-76 | 9.78E-73 |
| TEAD4    | 0.88  | 1.57E-09 | 2.52E-08 |
| TFAP2C   | -1.22 | 5.87E-11 | 1.18E-09 |
| TFEB     | -1.72 | 8.03E-12 | 1.81E-10 |
| TFE2     | -0.99 | 9.19E-05 | 6.46E-04 |
| TFPI2    | -1.54 | 2.08E-37 | 5.31E-35 |
| TGFB1    | -1.31 | 1.20E-17 | 5.17E-16 |
| THBD     | -1.05 | 7.61E-20 | 4.23E-18 |
| TIMP4    | -1.23 | 4.94E-05 | 3.65E-04 |
| TLR2     | -0.81 | 1.10E-05 | 9.27E-05 |
| TM7SF2   | -1.94 | 6.49E-27 | 6.97E-25 |
| TMEM132A | -1.88 | 9.61E-53 | 5.19E-50 |
| TMEM134  | -1.28 | 5.03E-09 | 7.55E-08 |
| TMEM154  | -1.73 | 1.03E-14 | 3.40E-13 |
| TMEM156  | -1.07 | 2.01E-10 | 3.72E-09 |
| TMEM158  | -1.21 | 1.13E-13 | 3.32E-12 |
| TMEM25   | -1.22 | 3.60E-15 | 1.25E-13 |

|           |       |          |          |
|-----------|-------|----------|----------|
| TMEM45B   | -2.66 | 1.45E-14 | 4.73E-13 |
| TMEM53    | -1.41 | 8.83E-07 | 9.03E-06 |
| TMEM55A   | -1.05 | 3.69E-06 | 3.39E-05 |
| TMEM87B   | -1.16 | 4.38E-24 | 3.70E-22 |
| TMEM92    | -1.15 | 2.54E-12 | 6.10E-11 |
| TMPO      | 0.98  | 6.10E-31 | 9.15E-29 |
| TNFRSF10C | -2.99 | 8.04E-12 | 1.81E-10 |
| TNFRSF14  | -1.22 | 4.04E-08 | 5.25E-07 |
| TNFSF10   | -1.21 | 5.24E-30 | 7.33E-28 |
| TOX2      | -1.37 | 1.53E-08 | 2.13E-07 |
| TP53I11   | -1.57 | 8.36E-18 | 3.64E-16 |
| TPBG      | -1.39 | 5.00E-23 | 3.82E-21 |
| TRANK1    | -0.90 | 3.05E-07 | 3.43E-06 |
| TRAPPC1   | -1.32 | 1.08E-15 | 3.95E-14 |
| TRAPPC6A  | -3.18 | 1.87E-08 | 2.57E-07 |
| TRIM2     | -1.16 | 3.68E-23 | 2.87E-21 |
| TRNP1     | -1.17 | 8.10E-07 | 8.35E-06 |
| TRPV2     | -2.01 | 7.31E-13 | 1.92E-11 |
| TSG101    | -1.20 | 2.58E-34 | 4.91E-32 |
| TSPAN13   | -1.42 | 1.97E-07 | 2.29E-06 |
| TSPAN9    | -1.18 | 1.24E-23 | 9.93E-22 |
| TLL4      | 1.26  | 2.26E-17 | 9.44E-16 |
| ITPAL     | 2.14  | 2.25E-78 | 4.02E-75 |
| TTYH3     | -1.53 | 2.73E-21 | 1.81E-19 |
| TUBA1A    | -1.64 | 5.85E-47 | 2.39E-44 |
| TXLNA     | 1.14  | 6.94E-37 | 1.70E-34 |
| TYMP      | -1.72 | 1.06E-10 | 2.03E-09 |
| UBE2E2    | -1.14 | 5.34E-13 | 1.43E-11 |
| UBE2E3    | 1.49  | 2.94E-37 | 7.35E-35 |
| UNG       | 1.07  | 7.85E-34 | 1.40E-31 |
| USP20     | -1.61 | 2.92E-26 | 2.95E-24 |
| VEGFA     | -1.37 | 2.60E-60 | 2.23E-57 |
| VIPR1     | -1.72 | 7.18E-37 | 1.74E-34 |
| VPS33A    | -1.20 | 4.65E-34 | 8.65E-32 |
| VSTM2L    | -1.20 | 1.66E-25 | 1.58E-23 |
| VTA1      | -1.20 | 1.48E-22 | 1.08E-20 |
| VTI1B     | -1.52 | 1.93E-34 | 3.77E-32 |
| VWA1      | -1.45 | 1.83E-18 | 8.82E-17 |
| WASF1     | 1.31  | 1.41E-05 | 1.17E-04 |
| WDR47     | -0.98 | 6.00E-11 | 1.20E-09 |
| WEE1      | 1.77  | 5.71E-54 | 3.40E-51 |
| WIP1      | -1.27 | 2.14E-29 | 2.87E-27 |
| WNT7B     | -1.59 | 4.50E-09 | 6.83E-08 |
| WT1       | -1.20 | 3.24E-10 | 5.84E-09 |
| WTIP      | 0.87  | 1.95E-11 | 4.20E-10 |
| XRCC2     | 1.62  | 6.09E-26 | 5.97E-24 |
| YES1      | 1.03  | 7.03E-38 | 1.81E-35 |
| YRDC      | 1.29  | 2.56E-29 | 3.40E-27 |
| ZC3H8     | 1.14  | 3.28E-10 | 5.89E-09 |
| ZCCHC4    | 1.24  | 2.89E-18 | 1.35E-16 |
| ZFAND3    | 1.19  | 4.10E-35 | 8.44E-33 |
| ZNF100    | 1.09  | 2.59E-06 | 2.44E-05 |
| ZNF107    | 2.10  | 3.74E-20 | 2.18E-18 |
| ZNF138    | 1.31  | 1.18E-09 | 1.95E-08 |
| ZNF266    | 1.60  | 2.31E-30 | 3.32E-28 |
| ZNF268    | 1.78  | 4.56E-35 | 9.22E-33 |
| ZNF271    | 1.04  | 4.79E-19 | 2.44E-17 |
| ZNF347    | 1.26  | 1.65E-24 | 1.44E-22 |
| ZNF35     | 1.16  | 5.85E-11 | 1.18E-09 |
| ZNF426    | 1.70  | 1.01E-23 | 8.14E-22 |
| ZNF43     | 1.67  | 3.08E-24 | 2.63E-22 |
| ZNF431    | 1.35  | 8.67E-15 | 2.88E-13 |
| ZNF433    | 1.00  | 7.33E-06 | 6.40E-05 |
| ZNF440    | 1.12  | 1.19E-10 | 2.27E-09 |
| ZNF441    | 1.23  | 5.33E-11 | 1.08E-09 |
| ZNF473    | 1.43  | 6.23E-32 | 1.03E-29 |
| ZNF502    | 0.97  | 2.99E-06 | 2.80E-05 |
| ZNF530    | 1.56  | 3.24E-17 | 1.33E-15 |
| ZNF559    | 2.01  | 1.68E-18 | 8.13E-17 |
| ZNF569    | 1.31  | 4.66E-15 | 1.59E-13 |
| ZNF587B   | 1.00  | 4.96E-09 | 7.45E-08 |
| ZNF625    | 0.96  | 1.04E-06 | 1.06E-05 |
| ZNF680    | 1.27  | 9.78E-13 | 2.50E-11 |
| ZNF699    | 1.40  | 9.13E-17 | 3.62E-15 |
| ZNF700    | 1.14  | 3.71E-08 | 4.85E-07 |
| ZNF714    | 1.63  | 1.87E-28 | 2.29E-26 |
| ZNF724P   | 1.37  | 5.57E-09 | 8.28E-08 |
| ZNF736    | 1.62  | 2.46E-10 | 4.50E-09 |
| ZNF788    | 1.31  | 2.99E-28 | 3.60E-26 |
| ZNF844    | 1.57  | 1.25E-15 | 4.55E-14 |
| ZNF85     | 1.66  | 1.30E-14 | 4.26E-13 |
| ZNF850    | 0.98  | 5.68E-12 | 1.30E-10 |
| ZNF92     | 1.23  | 4.55E-10 | 8.01E-09 |
| ZNF93     | 1.23  | 6.88E-12 | 1.56E-10 |
| ZYG11A    | 1.20  | 3.27E-08 | 4.32E-07 |

**Table 2. BCL11A-dependent AS exons with MBNL1 binding sites**

| <b>AS exons</b> | <b>AS exon with reproducible MBNL1 binding sites</b> |
|-----------------|------------------------------------------------------|
| ABI1            | ABI1                                                 |
| ACOX1           | ACOX1                                                |
| ADD3            | ADD3                                                 |
| AKAP11          | AKAP11                                               |
| ARHGEF1         | ARHGEF1                                              |
| ATP2C1          | ATP2C1                                               |
| ATP5SL          | C12orf23                                             |
| BIRC6           | C16orf13                                             |
| C12orf23        | C6orf52                                              |
| C16orf13        | CELF1                                                |
| C6orf52         | CLDND1                                               |
| CC2D2A          | CLPB                                                 |
| CELF1           | CSDA                                                 |
| CLDND1          | CSNK1D                                               |
| CLPB            | CTNND1                                               |
| CRYZ            | DNM1L                                                |
| CSDA            | DYNC1I2                                              |
| CSNK1D          | ENTPD6                                               |
| CTNND1          | ESYT2                                                |
| DCLRE1C         | EXOC1                                                |
| DGUOK           | EXOC2                                                |
| DNM1L           | FAM126A                                              |
| DYNC1I2         | FGFR1                                                |
| ENTPD6          | FLNB                                                 |
| ESYT2           | FN1                                                  |
| EXOC1           | FNIP1                                                |
| EXOC2           | HMGA1                                                |
| FAM126A         | HNRNPF                                               |
| FGFR1           | HSF2                                                 |
| FLNB            | INF2                                                 |
| FN1             | ISOC2                                                |
| FNIP1           | ITGA6                                                |
| FYN             | ITGB1BP1                                             |
| HMGA1           | KIAA1109                                             |
| HNRNPF          | KIF13A                                               |
| HSF2            | KIF13A                                               |
| INF2            | KLHL5                                                |
| ISOC2           | KPNA6                                                |
| ITGA6           | KTN1                                                 |
| ITGB1BP1        | LIMCH1                                               |
| KIAA1109        | LOC92249                                             |
| KIF13A          | LRRFIP2                                              |
| KIF13A          | MAG1                                                 |
| KLHL5           | MARK3                                                |
| KPNA6           | MBNL1                                                |
| KTN1            | MBNL2                                                |
| LIMCH1          | MDM4                                                 |
| LOC92249        | MFF                                                  |
| LRRFIP2         | MLLT4                                                |
| MAG1            | MRPL48                                               |
| MARK3           | MRPS10                                               |
| MBNL1           | MTA1                                                 |

|         |         |
|---------|---------|
| MBNL2   | MTERFD2 |
| MDM4    | MYOF    |
| MFF     | NAB1    |
| MITD1   | NEDD4L  |
| MLLT4   | NIN     |
| MRPL48  | NVL     |
| MRPS10  | OSBPL3  |
| MTA1    | PHACTR2 |
| MTERFD2 | PLEC    |
| MYOF    | PLSCR3  |
| NAB1    | PPFIA1  |
| NEDD4L  | PPIL3   |
| NIN     | PRKAA1  |
| NVL     | PRKAR1A |
| OSBPL3  | PVR     |
| PHACTR2 | RBPJ    |
| PLD1    | REPS1   |
| PLEC    | RNH1    |
| PLSCR3  | SAC3D1  |
| PPFIA1  | SDR42E1 |
| PPIL3   | SEC31A  |
| PRKAA1  | SENP7   |
| PRKAR1A | SEPT6   |
| PVR     | SH3D21  |
| RBPJ    | SLC38A2 |
| RECQL   | SLMAP   |
| REPS1   | SNX14   |
| RFESD   | STX3    |
| RNH1    | TPP2    |
| SAC3D1  | TRERF1  |
| SAT2    | TUFT1   |
| SDR42E1 | UGP2    |
| SEC31A  | VPS29   |
| SENP7   | WNK1    |
| SEPT6   | ZDHHC3  |
| SH3D21  | ZDHHC7  |
| SLC37A2 | ZMYM5   |
| SLC38A2 | ZNF271  |
| SLMAP   | ZNF673  |
| SNX14   | ZNF687  |
| STX3    |         |
| TPP2    |         |
| TRERF1  |         |
| TTC3    |         |
| TUFT1   |         |
| U2SURP  |         |
| UGP2    |         |
| VPS29   |         |
| WNK1    |         |
| ZDHHC3  |         |
| ZDHHC7  |         |
| ZMYM5   |         |
| ZNF271  |         |
| ZNF673  |         |
| ZNF687  |         |
